# Supplementary material for: Spatially Resolved Expression of Transposable Elements in Disease and Somatic Tissue with SpatialTE
Source: MDPI journal article supplement (doi:10.3390/ijms222413623), 2021-12-19
Supplement: s1 [file s1]

# **Spatially resolved expression of Transposable Elements in disease and somatic tissue with SpatialTE**

Brulio Valdebenito-Maturana, Cristina Guatimosim, Mónica Alejandra Carrasco and Juan Carlos Tapia

## **Supplementary File S3**

### Contents of this file

Seurat dimensional reduction plots and statistical parameters of TEs, obtained using the “FindAllMarkers” module.

For all tables, “avg\_log2FC” correspond to the Average  $\log_2$ (Fold Changes), “p\_val\_adj” to the adjusted P-value, and “cluster” to the cluster in which the TE was identified as marker.

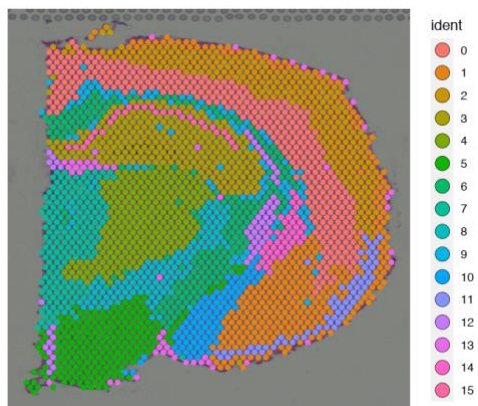

Brain coronal

|      | avg_log2FC | p_val_adj | cluster |
|------|------------|-----------|---------|
| LTR  | 0.20019091 | 3.73E-47  | 0       |
| SINE | -0.1886294 | 2.46E-33  | 0       |
| LINE | 0.17045444 | 1.04E-18  | 4       |
| DNA  | -0.2454087 | 2.00E-05  | 5       |

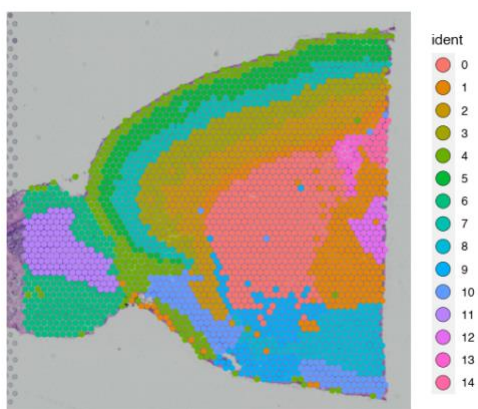

Sagittal anterior 1

|      | avg_log2FC | p_val_adj | cluster |
|------|------------|-----------|---------|
| SINE | 0.26578099 | 6.31E-42  | 8       |
| LTR  | 0.67821489 | 1.71E-72  | 11      |
| LINE | 0.31952677 | 3.44E-34  | 11      |
| DNA  | 0.482988   | 1.09E-20  | 11      |

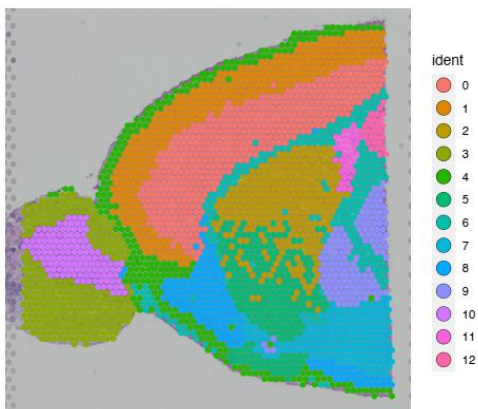

Sagittal anterior 2

|      | avg_log2FC | p_val_adj | cluster |
|------|------------|-----------|---------|
| LTR  | 0.26197027 | 4.30E-56  | 0       |
| LINE | 0.36430545 | 6.95E-37  | 10      |
| DNA  | 0.62224674 | 7.08E-26  | 10      |
| SINE | 0.47313812 | 2.93E-12  | 12      |

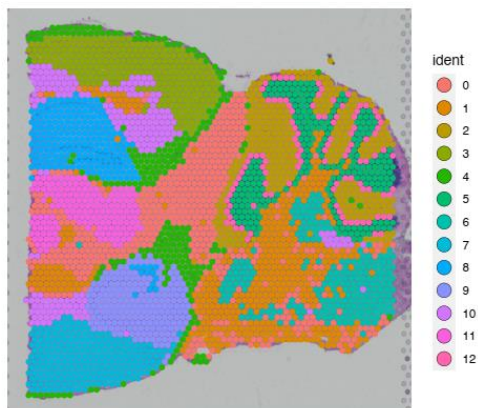

Sagittal Posterior 1

|      | avg_log2FC | p_val_adj | cluster |
|------|------------|-----------|---------|
| LTR  | 0.40316179 | 1.85E-45  | 2       |
| DNA  | 0.75064801 | 4.85E-39  | 6       |
| LINE | 0.31805117 | 6.35E-32  | 6       |
| SINE | 0.5271769  | 6.44E-75  | 9       |

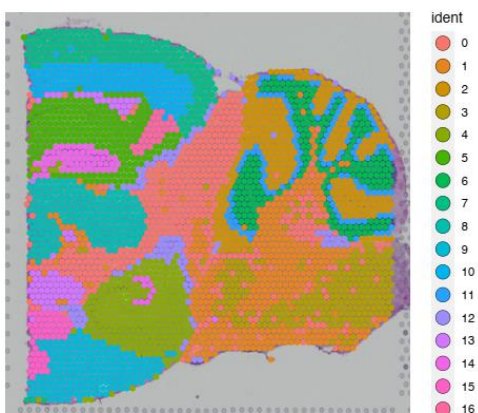

Sagittal Posterior 2

|      | avg_log2FC | p_val_adj | cluster |
|------|------------|-----------|---------|
| LTR  | 0.40316179 | 1.85E-45  | 2       |
| DNA  | 0.75064801 | 4.85E-39  | 6       |
| LINE | 0.31805117 | 6.35E-32  | 6       |
| SINE | 0.5271769  | 6.44E-75  | 9       |

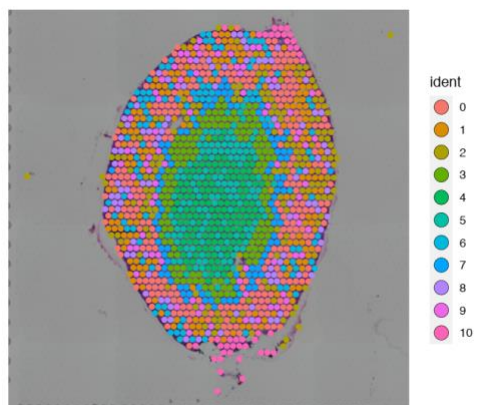

Kidney coronal

|      | avg_log2FC | p_val_adj  | cluster |
|------|------------|------------|---------|
| SINE | 0.31106376 | 1.61E-16   | 1       |
| LINE | 0.72851988 | 1.19E-42   | 2       |
| LTR  | 0.51897379 | 6.18E-47   | 4       |
| DNA  | 0.25283316 | 0.00011998 | 4       |
