# Supplementary material for: Spatially Resolved Expression of Transposable Elements in Disease and Somatic Tissue with SpatialTE
Source: MDPI journal article supplement (doi:10.3390/ijms222413623), 2021-12-19
Supplement: s1 [file s1]

**Supplementary table - Selected Visium 10X Spatial Transcriptomics datasets**

|                                                 |                                                                                                                                                                                                                                               |
|-------------------------------------------------|-----------------------------------------------------------------------------------------------------------------------------------------------------------------------------------------------------------------------------------------------|
| Mouse Brain Section Coronal 1                   | <a href="https://www.10xgenomics.com/resources/datasets/mouse-brain-section-coronal-1-standard-1-1-0">https://www.10xgenomics.com/resources/datasets/mouse-brain-section-coronal-1-standard-1-1-0</a>                                         |
| Mouse Brain Serial Section 1 Sagittal Anterior  | <a href="https://www.10xgenomics.com/resources/datasets/mouse-brain-serial-section-1-sagittal-anterior-1-standard-1-1-0">https://www.10xgenomics.com/resources/datasets/mouse-brain-serial-section-1-sagittal-anterior-1-standard-1-1-0</a>   |
| Mouse Brain Serial Section 1 Sagittal Posterior | <a href="https://www.10xgenomics.com/resources/datasets/mouse-brain-serial-section-1-sagittal-posterior-1-standard-1-1-0">https://www.10xgenomics.com/resources/datasets/mouse-brain-serial-section-1-sagittal-posterior-1-standard-1-1-0</a> |
| Mouse Brain Serial Section 2 Sagittal Anterior  | <a href="https://www.10xgenomics.com/resources/datasets/mouse-brain-serial-section-2-sagittal-anterior-1-standard-1-1-0">https://www.10xgenomics.com/resources/datasets/mouse-brain-serial-section-2-sagittal-anterior-1-standard-1-1-0</a>   |
| Mouse Brain Serial Section 2 Sagittal Posterior | <a href="https://www.10xgenomics.com/resources/datasets/mouse-brain-serial-section-2-sagittal-posterior-1-standard-1-1-0">https://www.10xgenomics.com/resources/datasets/mouse-brain-serial-section-2-sagittal-posterior-1-standard-1-1-0</a> |
| Mouse Kidney Section Coronal 1                  | <a href="https://www.10xgenomics.com/resources/datasets/mouse-kidney-section-coronal-1-standard-1-1-0">https://www.10xgenomics.com/resources/datasets/mouse-kidney-section-coronal-1-standard-1-1-0</a>                                       |
